# Supplementary material for: Synthesis of fluorescent tungsten disulfide by nitrogen atom doping and its application for mercury(ii) detection
Source: Royal Society of Chemistry journal article supplement (doi:10.1039/c8tc06233a), 2019-01-01
Supplement: c8tc06233a1.pdf [file c8tc06233a1.pdf]

***Electronic Supplementary Information***

**Synthesis of fluorescent tungsten disulfide by nitrogen atom doping and its  
application for mercury (II) detection**

Xiao Li,<sup>a</sup> Jing Liu,<sup>a</sup> Xin Gong,<sup>a</sup> Taiping Qing,<sup>\*b</sup> Peng Zhang<sup>b</sup> and Bo Feng<sup>\*ab</sup>

<sup>a</sup>College of Chemical Engineering, Xiangtan University, Xiangtan 411105, Hunan Province, China

<sup>b</sup>College of Environment and Resources, Xiangtan University, Xiangtan 411105, Hunan Province, China

\*To whom correspondence should be addressed. Tel.: +86 731 58298259; Fax: +86 731 58298172; E-mail: fengbo@xtu.edu.cn. Correspondence may also be addressed to Taiping Qing. E-mail: taiping\_qing@163.com

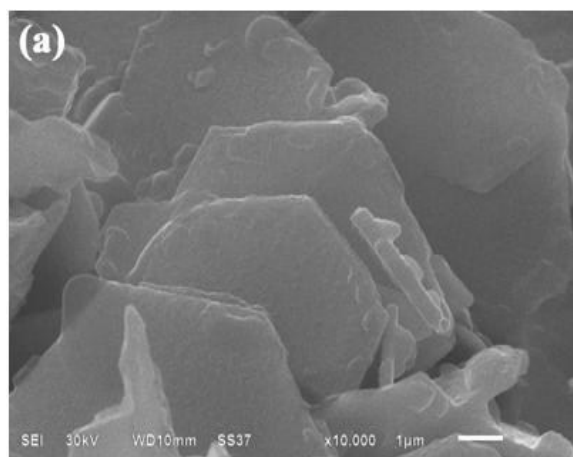

**Fig. S1** SEM image of bulk WS<sub>2</sub>

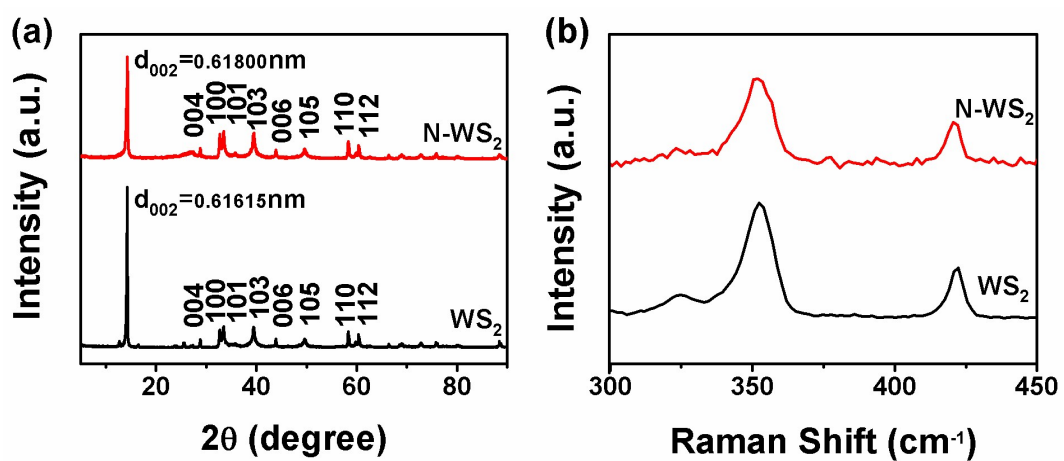

Fig. S2 (a) XRD spectra of as-made N-WS<sub>2</sub> and WS<sub>2</sub>. (b) Raman spectrum of N-WS<sub>2</sub> and WS<sub>2</sub>

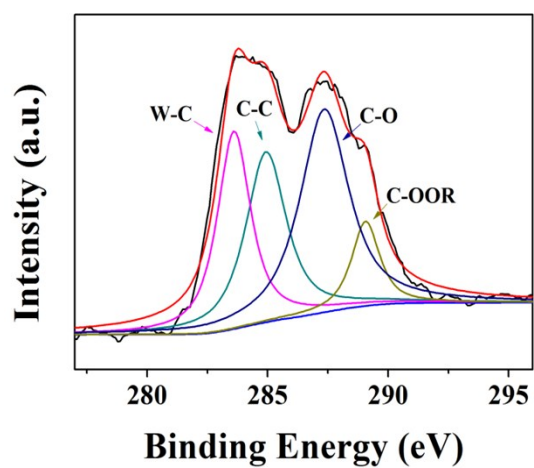

**Fig. S3** High resolution of C 1s orbits of N-WS<sub>2</sub>. A peak of C is due to the adsorption of carbon compounds on the surface of the product in the atmosphere during the sampling process.

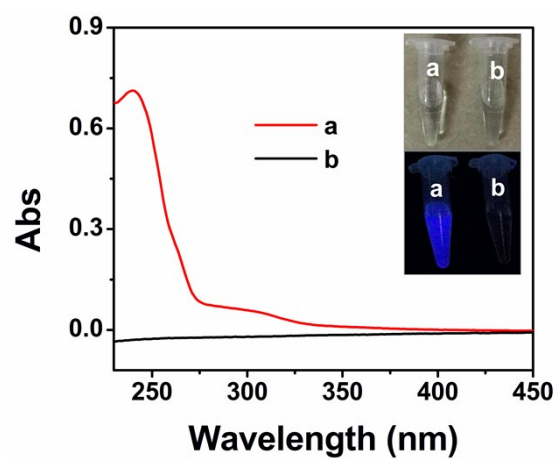

**Fig. S4** UV-vis absorption spectra of the N-WS<sub>2</sub> (0.1 mg/mL) in the absence (a) and presence (b) of mercury (II), inset: photographs of corresponding solutions under room light (up) and ultraviolet light (down), the concentration of mercury ions was 25  $\mu$ M

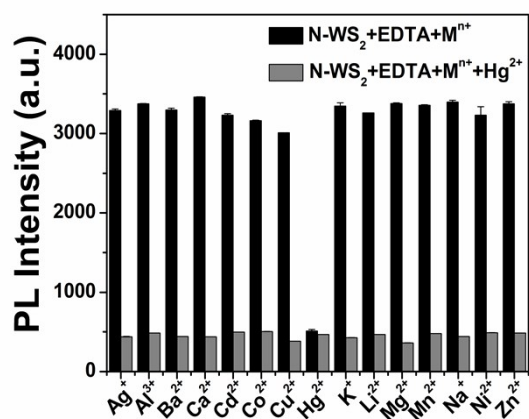

**Fig. S5** Fluorescent response of N-WS<sub>2</sub> towards different ions, the black bar represents the fluorescence intensity of N-WS<sub>2</sub> in the presence of EDTA and different metal ions; the gray bar represents the changed values of fluorescence intensity that occurred upon addition of Hg<sup>2+</sup> ions to the previous solution. ( $\lambda_{ex} = 250$  nm, the concentration of ions and EDTA were 25  $\mu$ M, 500  $\mu$ M, the concentration of N-WS<sub>2</sub> was 0.1 mg mL<sup>-1</sup>)

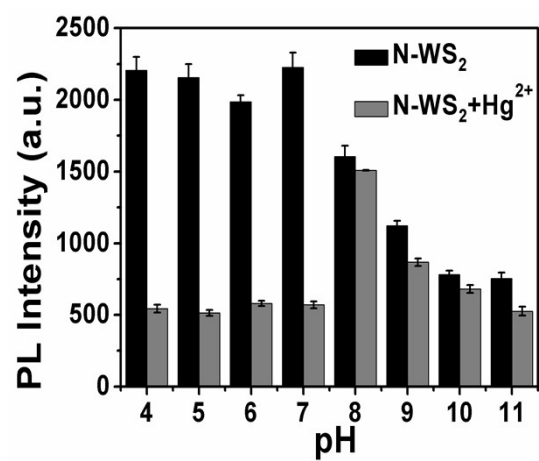

**Fig. S6** Effect of pH on N-WS<sub>2</sub> solution with addition of the mercury (II), the concentration of mercury (II) was 25  $\mu\text{M}$ , the concentration of N-WS<sub>2</sub> was 0.1  $\text{mg mL}^{-1}$

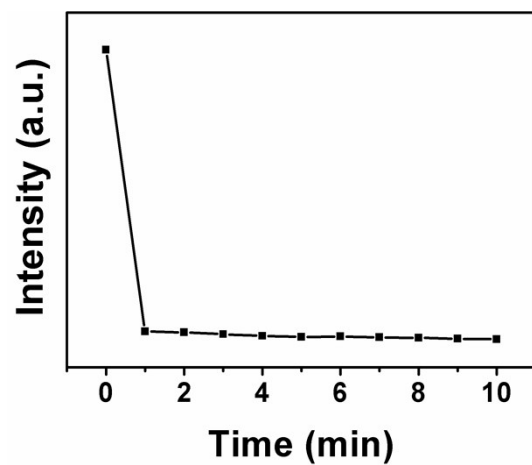

**Fig. S7** Fluorescence intensity of N-WS<sub>2</sub> with reaction times after added mercury (II), the concentration of mercury (II) was 25  $\mu\text{M}$ , the concentration of N-WS<sub>2</sub> was 0.1  $\text{mg mL}^{-1}$



**Table S1.** Comparisons of LOD and linear range of different fluorescent probes for mercury (II) detection

| Probe                                 | Linear range ( $\mu\text{M}$ ) | LOD ( $\mu\text{M}$ ) | References                                           |
|---------------------------------------|--------------------------------|-----------------------|------------------------------------------------------|
| phenylamine-oligothiophene derivative | 0–10                           | 0.439                 | <i>Spectrochim. Acta A</i> , 2016, 153, 3-146        |
| Polymer                               | 0–30                           | 0.728                 | <i>J. Mater. Chem.</i> , 2012, 22, 478-482           |
| organic molecules NBD                 | 0.1–80                         | 0.03                  | <i>Anal. Methods.</i> , 2014, 6, 4797                |
| Polymer Sensor                        | 1–30                           | 0.728                 | <i>J. Mater. Chem.</i> , 2012, 22, 478-482           |
| BODIPY-based probe                    | 0–15                           | 0.17                  | <i>Inorg. Chem.</i> , 2016, 55, 12052–12060          |
| AuNCs                                 | 0.1–10                         | 0.05                  | <i>Talanta</i> , 2016, 161, 170-176                  |
| Carbon dots                           | 0–2.69                         | 1.3                   | <i>Biosens. Bioelectron.</i> , 2010, 26, 1302-1306   |
| N-CQDs                                | 0–25                           | 0.23                  | <i>Biosens. Bioelectron.</i> , 2014, 55, 83-90       |
| Polymer nanoparticle                  | 0–10                           | 0.075                 | <i>Sens. Actuators B: Chem.</i> , 2017, 242: 818-824 |
| AgNCs                                 | 0.03–5.2                       | 0.016                 | <i>Sens. Actuators B: Chem.</i> , 2017, 250, 364-371 |
| N-WS <sub>2</sub>                     | 0.1–10                         | 0.02                  | Present work                                         |

**Table S2.** Sample recovery rate of mercury (II) in the actual water

| <b>Samples</b> | <b>Added</b> | <b>Found</b> | <b>Recovery (%)</b> | <b>RSD (n=3, %)</b> |
|----------------|--------------|--------------|---------------------|---------------------|
| 0              | 0            | 0            | /                   | /                   |
| 1              | 3            | 2.970        | 99                  | 7.47                |
| 2              | 5            | 5.118        | 102.36              | 5.82                |
| 3              | 7            | 7.103        | 100.19              | 6.41                |
